# Supplementary material for: An In Silico Identification of Common Putative Vaccine Candidates against Treponema pallidum: A Reverse Vaccinology and Subtractive Genomics Based Approach
Source: Int J Mol Sci. 2017 Feb 14;18(2):402. doi: 10.3390/ijms18020402 (PMC5343936; doi:10.3390/ijms18020402)
Supplement: Supplementary file 1 [file ijms-18-00402-s001.xls]

## Sheet: Plan1
Query Protein	No. of homologs in DEG	DEG AC Number
Tp_Nichols84	4	DEG10270504; DEG10070115; DEG10060157; DEG10140014;
Tp_Nichols85	3	DEG10250450; DEG10350141; DEG10350142
Tp_Nichols87	9	DEG10240265; DEG10310059; DEG10350106; DEG10070101; DEG10410479; DEG10360122; DEG10400014; DEG10200445; DEG10260042;
Tp_Nichols89	1	DEG10150183;
Tp_Nichols91	7	DEG10030266; DEG10410274; DEG10220041; DEG10340155; DEG10230304; DEG10260026; DEG10280038;
Tp_Nichols95	6	DEG10180477; DEG10020243; DEG10240033; DEG10020295; DEG10050416; DEG10020060;
Tp_Nichols100	12	DEG10030043; DEG10370123; DEG10210106; DEG10410438; DEG10200343; DEG10400434; DEG10280453; DEG10070176; DEG10010106; DEG10120112; DEG10380132; DEG10170067;
Tp_Nichols102	12	DEG10160051; DEG10030497; DEG10230118; DEG10340177; DEG10250222; DEG10190152; DEG10280461; DEG10220200; DEG10330052; DEG10300023; DEG10230314; DEG10350300;
Tp_Nichols105	9	DEG10140080; DEG10170051; DEG10340084; DEG10200353; DEG10050446; DEG10060240; DEG10230230; DEG10220243; DEG10020053;
Tp_Nichols107	3	DEG10340273; DEG10220094; DEG10390051;
Tp_Nichols110	2	DEG10410333; DEG10140073;
Tp_Nichols111	6	DEG10280307; DEG10050531; DEG10100069; DEG10410056; DEG10250105; DEG10010166;
Tp_Nichols112	4	DEG10080040; DEG10410465; DEG10400083; DEG10100070;
Tp_Nichols118	1	DEG10350224;
Tp_Nichols125	5	DEG10180476; DEG10220248; DEG10340510; DEG10230134; DEG10390151;
Tp_Nichols127	2	DEG10110223; DEG10300086;
Tp_Nichols128	2	DEG10260103; DEG10300085;
Tp_Nichols129	10	DEG10130141; DEG10280018; DEG10100054; DEG10070085; DEG10270078; DEG10250080; DEG10200388; DEG10050142; DEG10310144; DEG10410477;
Tp_Nichols130	5	DEG10050448; DEG10060055; DEG10020228; DEG10020066; DEG10270219;
Tp_Nichols238	2	DEG10130374; DEG10400645;
Tp_Nichols239	1	DEG10400645;
Tp_Nichols243	1	DEG10280385;
Tp_Nichols251	3	DEG10410180; DEG10240229; DEG10200162;
Tp_Nichols252	15	DEG10330271; DEG10240354; DEG10350415; DEG10150311; DEG10290352; DEG10400176; DEG10180563; DEG10320322; DEG10020115; DEG10010112; DEG10230163; DEG10270254; DEG10170136; DEG10160267; DEG10250266;
Tp_Nichols259	23	DEG10390197; DEG10240346; DEG10160263; DEG10360211; DEG10080222; DEG10330266; DEG10350412; DEG10400170; DEG10270112; DEG10290021; DEG10250122; DEG10130047; DEG10310052; DEG10030046; DEG10120340; DEG10220333; DEG10230159; DEG10200385; DEG10410420; DEG10050240; DEG10280259; DEG10340490; DEG10190275;
Tp_Nichols261	22	DEG10170041; DEG10120338; DEG10060064; DEG10240344; DEG10410418; DEG10280261; DEG10340488; DEG10370057; DEG10290023; DEG10250124; DEG10210147; DEG10020044; DEG10130049; DEG10140007; DEG10030048; DEG10220331; DEG10230158; DEG10010025; DEG10400168; DEG10380054; DEG10360209; DEG10150031;
Tp_Nichols262	25	DEG10170042; DEG10120337; DEG10240343; DEG10160261; DEG10410417; DEG10060295; DEG10330264; DEG10350410; DEG10180569; DEG10290024; DEG10020045; DEG10140108; DEG10320329; DEG10200082; DEG10280380; DEG10030049; DEG10250127; DEG10100090; DEG10010026; DEG10310054; DEG10210112; DEG10400167; DEG10360208; DEG10130050; DEG10190276;
Tp_Nichols271	7	DEG10200239; DEG10350049; DEG10290076; DEG10050029; DEG10170229; DEG10240052; DEG10310167;
Tp_Nichols278	25	DEG10200477; DEG10380087; DEG10120357; DEG10140097; DEG10360316; DEG10240272; DEG10220347; DEG10340350; DEG10230082; DEG10140165; DEG10280102; DEG10290065; DEG10120308; DEG10100196; DEG10250235; DEG10020238; DEG10270230; DEG10350110; DEG10160253; DEG10330256; DEG10140079; DEG10410077; DEG10370086; DEG10030039; DEG10320314;
Tp_Nichols280	28	DEG10170170; DEG10120048; DEG10290176; DEG10160080; DEG10150154; DEG10130054; DEG10270493; DEG10050057; DEG10080172; DEG10330082; DEG10350296; DEG10250531; DEG10020141; DEG10410208; DEG10240207; DEG10180325; DEG10100434; DEG10010141; DEG10210216; DEG10360082; DEG10190127; DEG10380239; DEG10320177; DEG10280394; DEG10200360; DEG10140058; DEG10070243; DEG10030246;
Tp_Nichols297	7	DEG10340398; DEG10230115; DEG10180135; DEG10310048; DEG10220461; DEG10080042; DEG10310129;
Tp_Nichols298	24	DEG10100608; DEG10170191; DEG10380106; DEG10010155; DEG10070190; DEG10210108; DEG10220173; DEG10190177; DEG10340369; DEG10240013; DEG10270680; DEG10130266; DEG10050575; DEG10250763; DEG10350016; DEG10230097; DEG10400204; DEG10180455; DEG10160212; DEG10370102; DEG10410210; DEG10320244; DEG10110168; DEG10330215;
Tp_Nichols299	16	DEG10240406; DEG10200475; DEG10230274; DEG10270685; DEG10390016; DEG10020017; DEG10100611; DEG10250768; DEG10410075; DEG10030778; DEG10170347; DEG10350423; DEG10240364; DEG10340115; DEG10280299; DEG10220036;
Tp_Nichols300	19	DEG10200476; DEG10030779; DEG10180197; DEG10270326; DEG10260032; DEG10340116; DEG10350495; DEG10190099; DEG10100612; DEG10080211; DEG10290241; DEG10250769; DEG10250359; DEG10410076; DEG10270686; DEG10060381; DEG10100296; DEG10220037; DEG10280298;
Tp_Nichols303	1	DEG10400418;
Tp_Nichols305	4	DEG10400141; DEG10400602; DEG10110109; DEG10410042;
Tp_Nichols310	25	DEG10370161; DEG10130351; DEG10200198; DEG10240027; DEG10160282; DEG10150013; DEG10400501; DEG10220340; DEG10050210; DEG10280005; DEG10290390; DEG10360016; DEG10030027; DEG10390202; DEG10070106; DEG10320302; DEG10190247; DEG10380175; DEG10330286; DEG10120179; DEG10340544; DEG10410277; DEG10170116; DEG10210059; DEG10180537;
Tp_Nichols316	4	DEG10140113; DEG10060221; DEG10180129; DEG10140085;
Tp_Nichols318	5	DEG10350322; DEG10410550; DEG10030351; DEG10030188; DEG10270161;
Tp_Nichols322	10	DEG10290066; DEG10130055; DEG10150266; DEG10390179; DEG10010210; DEG10170251; DEG10210144; DEG10360246; DEG10220306; DEG10080143;
Tp_Nichols327	1	DEG10060096;
Tp_Nichols332	31	DEG10390232; DEG10290055; DEG10370222; DEG10140283; DEG10230143; DEG10060252; DEG10400379; DEG10250677; DEG10030513; DEG10020203; DEG10160324; DEG10350395; DEG10190206; DEG10410223; DEG10100547; DEG10240314; DEG10200336; DEG10130409; DEG10010215; DEG10330328; DEG10120077; DEG10050287; DEG10210213; DEG10340456; DEG10360188; DEG10270606; DEG10380231; DEG10280132; DEG10220395; DEG10320266; DEG101702…
Tp_Nichols347	1	DEG10060096;
Tp_Nichols350	21	DEG10400239; DEG10390027; DEG10350253; DEG10120316; DEG10290158; DEG10190036; DEG10160041; DEG10240241; DEG10320040; DEG10360142; DEG10230236; DEG10150100; DEG10110020; DEG10030442; DEG10220052; DEG10180046; DEG10410328; DEG10330042; DEG10200256; DEG10280066; DEG10130201;
Tp_Nichols355	28	DEG10190184; DEG10400074; DEG10080192; DEG10390002; DEG10120163; DEG10200390; DEG10100569; DEG10360272; DEG10330229; DEG10140307; DEG10410199; DEG10160226; DEG10380004; DEG10110173; DEG10290109; DEG10240299; DEG10340120; DEG10130342; DEG10350095; DEG10350460; DEG10250704; DEG10400244; DEG10370004; DEG10220007; DEG10230277; DEG10020038; DEG10060369; DEG10030130;
Tp_Nichols360	2	DEG10360085; DEG10150148;
Tp_Nichols361	1	DEG10200112;
Tp_Nichols367	16	DEG10060176; DEG10050080; DEG10050199; DEG10340089; DEG10180012; DEG10260015; DEG10050020; DEG10080123; DEG10050140; DEG10250308; DEG10180402; DEG10270289; DEG10390086; DEG10080162; DEG10140111; DEG10220151;
Tp_Nichols369	42	DEG10290363; DEG10330019; DEG10030478; DEG10050409; DEG10290366; DEG10230206; DEG10190015; DEG10050055; DEG10410439; DEG10380041; DEG10230209; DEG10130482; DEG10320019; DEG10100324; DEG10170261; DEG10380174; DEG10240111; DEG10120133; DEG10010217; DEG10400435; DEG10340062; DEG10340060; DEG10010104; DEG10310136; DEG10220122; DEG10160018; DEG10150250; DEG10280455; DEG10270375; DEG10070186; DEG103602…
Tp_Nichols373	36	DEG10130456; DEG10290367; DEG10330015; DEG10240107; DEG10010244; DEG10400038; DEG10190011; DEG10210168; DEG10280457; DEG10370172; DEG10220118; DEG10380186; DEG10020107; DEG10250410; DEG10320015; DEG10100328; DEG10170127; DEG10070014; DEG10400066; DEG10120138; DEG10030481; DEG10340063; DEG10410442; DEG10150253; DEG10270379; DEG10010103; DEG10270233; DEG10160014; DEG10250239; DEG10200348; DEG102302…
Tp_Nichols377	4	DEG10180514; DEG10030148; DEG10310010; DEG10150269;
Tp_Nichols379	9	DEG10130307; DEG10410038; DEG10400544; DEG10240123; DEG10100390; DEG10280435; DEG10250475; DEG10350372; DEG10270445;
Tp_Nichols388	3	DEG10250599; DEG10270549; DEG10100493;
Tp_Nichols395	2	DEG10110115; DEG10300014;
Tp_Nichols400	7	DEG10350262; DEG10020122; DEG10070066; DEG10140282; DEG10240232; DEG10010121; DEG10410529;
Tp_Nichols404	23	DEG10150282; DEG10160086; DEG10400078; DEG10010011; DEG10230027; DEG10350026; DEG10120025; DEG10360259; DEG10330088; DEG10280476; DEG10200164; DEG10250187; DEG10100152; DEG10240030; DEG10270184; DEG10030425; DEG10220218; DEG10050577; DEG10340305; DEG10180205; DEG10320164; DEG10190102; DEG10290329;
Tp_Nichols406	5	DEG10390023; DEG10170028; DEG10250189; DEG10340167; DEG10220047;
Tp_Nichols407	29	DEG10130378; DEG10340189; DEG10030433; DEG10010016; DEG10380003; DEG10200391; DEG10160048; DEG10410198; DEG10230081; DEG10210005; DEG10360135; DEG10310193; DEG10330049; DEG10180053; DEG10390263; DEG10290165; DEG10400286; DEG10170031; DEG10150106; DEG10100571; DEG10250706; DEG10120282; DEG10370003; DEG10320047; DEG10350269; DEG10220438; DEG10240224; DEG10020037; DEG10190043;
Tp_Nichols412	33	DEG10400071; DEG10260035; DEG10390172; DEG10270340; DEG10030473; DEG10270575; DEG10150247; DEG10120164; DEG10230302; DEG10360217; DEG10160023; DEG10250638; DEG10370198; DEG10200375; DEG10130107; DEG10170070; DEG10140027; DEG10020064; DEG10060054; DEG10330024; DEG10290357; DEG10240117; DEG10100514; DEG10010243; DEG10250368; DEG10380210; DEG10220292; DEG10190021; DEG10180026; DEG10020297; DEG103200…
Tp_Nichols157	3	DEG10140046; DEG10380036; DEG10060261;
Tp_Nichols416	7	DEG10060188; DEG10340068; DEG10330009; DEG10160008; DEG10250416; DEG10140189; DEG10100333;
Tp_Nichols419	50	DEG10130457; DEG10380166; DEG10340078; DEG10330014; DEG10290368; DEG10290369; DEG10240106; DEG10330013; DEG10220249; DEG10010070; DEG10400378; DEG10190009; DEG10230225; DEG10220247; DEG10020229; DEG10190010; DEG10220117; DEG10150255; DEG10280458; DEG10180016; DEG10200350; DEG10370152; DEG10320013; DEG10320014; DEG10250411; DEG10250412; DEG10100329; DEG10210067; DEG10030482; DEG10340064; DEG101201…
Tp_Nichols422	37	DEG10290361; DEG10400077; DEG10030476; DEG10340058; DEG10350377; DEG10310087; DEG10280450; DEG10230204; DEG10410436; DEG10160020; DEG10230243; DEG10110012; DEG10340449; DEG10150249; DEG10390105; DEG10370158; DEG10390072; DEG10020109; DEG10380171; DEG10200186; DEG10330021; DEG10240114; DEG10050412; DEG10220183; DEG10120031; DEG10010108; DEG10360221; DEG10190017; DEG10200340; DEG10180023; DEG100702…
Tp_Nichols423	33	DEG10340057; DEG10290360; DEG10400616; DEG10350376; DEG10030475; DEG10070204; DEG10310088; DEG10140186; DEG10230203; DEG10410435; DEG10160021; DEG10190018; DEG10110013; DEG10200339; DEG10370157; DEG10100322; DEG10210062; DEG10380170; DEG10330022; DEG10240115; DEG10050413; DEG10120032; DEG10010109; DEG10080167; DEG10360220; DEG10060191; DEG10180024; DEG10280449; DEG10130478; DEG10250404; DEG100201…
Tp_Nichols426	2	DEG10080058; DEG10320221;
Tp_Nichols428	3	DEG10350013; DEG10180554; DEG10100295;
Tp_Nichols434	6	DEG10270526; DEG10240293; DEG10100470; DEG10030353; DEG10350216; DEG10250570;
Tp_Nichols440	24	DEG10400612; DEG10010201; DEG10270244; DEG10160266; DEG10340092; DEG10170123; DEG10320323; DEG10180565; DEG10380043; DEG10030020; DEG10020105; DEG10250249; DEG10150278; DEG10130441; DEG10120263; DEG10230235; DEG10310212; DEG10330270; DEG10370048; DEG10280419; DEG10070223; DEG10290016; DEG10210156; DEG10190271;
Tp_Nichols442	6	DEG10330129; DEG10320102; DEG10020122; DEG10160127; DEG10060185; DEG10010121;
Tp_Nichols445	39	DEG10130097; DEG10170232; DEG10270478; DEG10050106; DEG10150077; DEG10270477; DEG10390219; DEG10240149; DEG10130098; DEG10400035; DEG10400036; DEG10310147; DEG10200292; DEG10200291; DEG10220367; DEG10410306; DEG10320051; DEG10320052; DEG10410305; DEG10180073; DEG10180074; DEG10110030; DEG10160171; DEG10160172; DEG10240150; DEG10290273; DEG10120246; DEG10120245; DEG10280196; DEG10280197; DEG101900…
Tp_Nichols446	21	DEG10130097; DEG10170232; DEG10190048; DEG10270477; DEG10180074; DEG10050106; DEG10250508; DEG10150077; DEG10110030; DEG10390219; DEG10220367; DEG10240149; DEG10410305; DEG10400035; DEG10320052; DEG10120245; DEG10140255; DEG10160171; DEG10330174; DEG10280197; DEG10200291;
Tp_Nichols448	16	DEG10170303; DEG10370121; DEG10380128; DEG10270603; DEG10160225; DEG10360270; DEG10320250; DEG10100543; DEG10250671; DEG10290111; DEG10010066; DEG10110172; DEG10330228; DEG10050536; DEG10220246; DEG10130474;
Tp_Nichols449	2	DEG10110061; DEG10050085;
Tp_Nichols454	4	DEG10290292; DEG10390008; DEG10340117; DEG10220025;
Tp_Nichols135	1	DEG10050119;
Tp_Nichols160	2	DEG10050061; DEG10030729;
Tp_Nichols462	46	DEG10030559; DEG10380085; DEG10200418; DEG10380087; DEG10060328; DEG10150334; DEG10200416; DEG10080206; DEG10120357; DEG10120359; DEG10210080; DEG10130026; DEG10410045; DEG10350417; DEG10310006; DEG10290397; DEG10290395; DEG10130028; DEG10400094; DEG10250245; DEG10140165; DEG10400598; DEG10280104; DEG10280102; DEG10410043; DEG10240358; DEG10240356; DEG10250243; DEG10100205; DEG10100207; DEG100603…
Tp_Nichols463	46	DEG10030559; DEG10380085; DEG10200418; DEG10380087; DEG10060328; DEG10150334; DEG10200416; DEG10360331; DEG10120357; DEG10120359; DEG10210080; DEG10130026; DEG10250245; DEG10350417; DEG10310006; DEG10290397; DEG10350419; DEG10130028; DEG10400094; DEG10410045; DEG10140165; DEG10400598; DEG10280104; DEG10280102; DEG10250243; DEG10100207; DEG10240356; DEG10410043; DEG10100205; DEG10210078; DEG102403…
Tp_Nichols467	11	DEG10220316; DEG10240021; DEG10390185; DEG10340150; DEG10150029; DEG10400453; DEG10360213; DEG10200268; DEG10130129; DEG10230303; DEG10350021;
Tp_Nichols472	13	DEG10060159; DEG10070076; DEG10270505; DEG10390149; DEG10140198; DEG10170007; DEG10340403; DEG10060304; DEG10250547; DEG10210155; DEG10140272; DEG10220244; DEG10100448;
Tp_Nichols479	26	DEG10120306; DEG10030174; DEG10280205; DEG10320219; DEG10160185; DEG10230262; DEG10250356; DEG10170103; DEG10330187; DEG10290142; DEG10310078; DEG10240154; DEG10070061; DEG10130261; DEG10340416; DEG10380134; DEG10220140; DEG10210118; DEG10370125; DEG10360109; DEG10100292; DEG10350348; DEG10180410; DEG10390081; DEG10190160; DEG10010092;
Tp_Nichols480	1	DEG10070066;
Tp_Nichols484	24	DEG10130094; DEG10400193; DEG10270515; DEG10010176; DEG10310085; DEG10220209; DEG10240275; DEG10340514; DEG10250555; DEG10390125; DEG10230133; DEG10030163; DEG10330060; DEG10290283; DEG10320200; DEG10120242; DEG10150083; DEG10350114; DEG10160059; DEG10190145; DEG10200113; DEG10410126; DEG10180382; DEG10360161;
Tp_Nichols486	4	DEG10060021; DEG10020233; DEG10400425; DEG10140121;
Tp_Nichols488	63	DEG10010033; DEG10130313; DEG10340492; DEG10230160; DEG10060366; DEG10170048; DEG10170049; DEG10050638; DEG10020086; DEG10020099; DEG10030135; DEG10360266; DEG10220422; DEG10010032; DEG10410411; DEG10110190; DEG10280185; DEG10100449; DEG10350413; DEG10270119; DEG10180509; DEG10150286; DEG10130146; DEG10370036; DEG10340483; DEG10390199; DEG10200009; DEG10140160; DEG10350405; DEG10070012; DEG103303…
Tp_Nichols496	2	DEG10010167; DEG10140034;
Tp_Nichols497	9	DEG10050444; DEG10220254; DEG10270327; DEG10100297; DEG10250360; DEG10230257; DEG10180218; DEG10340427; DEG10390153;
Tp_Nichols502	5	DEG10270034; DEG10250032; DEG10100016; DEG10030084; DEG10060285;
Tp_Nichols510	6	DEG10060174; DEG10100231; DEG10250271; DEG10020104; DEG10270258; DEG10180295;
Tp_Nichols514	6	DEG10140081; DEG10060294; DEG10180359; DEG10030589; DEG10220242; DEG10020202;
Tp_Nichols533	5	DEG10080094; DEG10220077; DEG10410367; DEG10250500; DEG10290246;
Tp_Nichols534	27	DEG10120215; DEG10130353; DEG10240367; DEG10100370; DEG10010179; DEG10210086; DEG10060211; DEG10230266; DEG10320247; DEG10170208; DEG10140167; DEG10200373; DEG10370090; DEG10250453; DEG10380091; DEG10050169; DEG10270420; DEG10220377; DEG10400324; DEG10180456; DEG10360024; DEG10160216; DEG10020170; DEG10070161; DEG10410216; DEG10290119; DEG10330219;
Tp_Nichols536	2	DEG10220437; DEG10230042;
Tp_Nichols538	21	DEG10200186; DEG10340449; DEG10160241; DEG10400077; DEG10060246; DEG10330244; DEG10190198; DEG10290351; DEG10150262; DEG10180486; DEG10350009; DEG10230243; DEG10360243; DEG10390105; DEG10210188; DEG10220183; DEG10010198; DEG10030073; DEG10310027; DEG10280075; DEG10240007;
Tp_Nichols539	15	DEG10400076; DEG10200187; DEG10190197; DEG10240006; DEG10160240; DEG10290350; DEG10340448; DEG10180485; DEG10330243; DEG10010197; DEG10360242; DEG10220184; DEG10050016; DEG10230244; DEG10280076;
Tp_Nichols550	2	DEG10400655; DEG10300030;
Tp_Nichols555	3	DEG10250692; DEG10200090; DEG10280383;
Tp_Nichols557	5	DEG10260067; DEG10050201; DEG10120193; DEG10300004; DEG10380035;
Tp_Nichols558	13	DEG10020250; DEG10380237; DEG10120209; DEG10360106; DEG10370225; DEG10060151; DEG10350194; DEG10060341; DEG10150123; DEG10020222; DEG10230224; DEG10200440; DEG10020067;
Tp_Nichols560	17	DEG10160121; DEG10200017; DEG10190085; DEG10350053; DEG10150272; DEG10290308; DEG10270682; DEG10130011; DEG10250765; DEG10320109; DEG10410478; DEG10330123; DEG10360251; DEG10400515; DEG10110070; DEG10180175; DEG10030145;
Tp_Nichols561	5	DEG10250511; DEG10310228; DEG10290232; DEG10400206; DEG10180312;
Tp_Nichols562	1	DEG10170140;
Tp_Nichols564	19	DEG10200087; DEG10300095; DEG10200130; DEG10300076; DEG10200128; DEG10200422; DEG10170010; DEG10400235; DEG10110029; DEG10350488; DEG10340402; DEG10400403; DEG10350451; DEG10010262; DEG10410096; DEG10130463; DEG10260096; DEG10410472; DEG10250729;
Tp_Nichols565	34	DEG10170021; DEG10160163; DEG10380161; DEG10030223; DEG10220190; DEG10320058; DEG10140019; DEG10400233; DEG10270651; DEG10210104; DEG10360058; DEG10240256; DEG10020026; DEG10070050; DEG10190054; DEG10410135; DEG10330166; DEG10290186; DEG10390111; DEG10250726; DEG10010009; DEG10180088; DEG10010007; DEG10120034; DEG10030388; DEG10200037; DEG10280012; DEG10290244; DEG10070046; DEG10370147; DEG102300…
Tp_Nichols567	32	DEG10330018; DEG10290364; DEG10030479; DEG10120272; DEG10050408; DEG10270376; DEG10230207; DEG10190014; DEG10130483; DEG10320018; DEG10370159; DEG10100325; DEG10210061; DEG10180019; DEG10400595; DEG10380173; DEG10240110; DEG10170183; DEG10340061; DEG10010105; DEG10150251; DEG10390070; DEG10160017; DEG10360223; DEG10410440; DEG10220121; DEG10110009; DEG10200345; DEG10070141; DEG10250407; DEG103503…
Tp_Nichols171	2	DEG10220359; DEG10390216;
Tp_Nichols570	17	DEG10140194; DEG10350297; DEG10290217; DEG10180585; DEG10410268; DEG10270470; DEG10200101; DEG10060017; DEG10100408; DEG10400665; DEG10240206; DEG10020167; DEG10120006; DEG10030245; DEG10250496; DEG10170204; DEG10070028;
Tp_Nichols172	1	DEG10400199;
Tp_Nichols590	1	DEG10400534;
Tp_Nichols592	64	DEG10200195; DEG10410374; DEG10030494; DEG10170210; DEG10130096; DEG10170194; DEG10390005; DEG10060007; DEG10100373; DEG10280349; DEG10150241; DEG10400402; DEG10120258; DEG10310082; DEG10070211; DEG10130311; DEG10350005; DEG10230249; DEG10340440; DEG10410037; DEG10360036; DEG10240278; DEG10140144; DEG10380040; DEG10220019; DEG10220018; DEG10180396; DEG10360159; DEG10170349; DEG10180380; DEG100503…
Tp_Nichols593	11	DEG10070151; DEG10380154; DEG10010211; DEG10340339; DEG10170253; DEG10370140; DEG10210089; DEG10050344; DEG10020197; DEG10230009; DEG10140243;
Tp_Nichols594	8	DEG10350352; DEG10170234; DEG10220179; DEG10030355; DEG10410191; DEG10390102; DEG10300026; DEG10070007;
Tp_Nichols597	12	DEG10080174; DEG10190195; DEG10270215; DEG10380241; DEG10180482; DEG10160238; DEG10290343; DEG10250223; DEG10330241; DEG10100181; DEG10030114; DEG10290342;
Tp_Nichols598	21	DEG10290304; DEG10280274; DEG10230107; DEG10190003; DEG10150268; DEG10130450; DEG10200408; DEG10250208; DEG10310114; DEG10330005; DEG10050358; DEG10340387; DEG10030149; DEG10270197; DEG10360247; DEG10320007; DEG10010177; DEG10160005; DEG10220132; DEG10120094; DEG10180008;
Tp_Nichols173	2	DEG10050140; DEG10260015;
Tp_Nichols606	1	DEG10310181;
Tp_Nichols609	1	DEG10050178;
Tp_Nichols613	2	DEG10060305; DEG10140285;
Tp_Nichols615	2	DEG10220343; DEG10390204;
Tp_Nichols619	1	DEG10170091;
Tp_Nichols621	1	DEG10240141;
Tp_Nichols175	2	DEG10290256; DEG10180128;
Tp_Nichols624	2	DEG10220344; DEG10390205;
Tp_Nichols630	56	DEG10340132; DEG10160089; DEG10230286; DEG10340070; DEG10400547; DEG10370126; DEG10010242; DEG10100500; DEG10050564; DEG10270559; DEG10170297; DEG10250614; DEG10130286; DEG10200238; DEG10220263; DEG10350279; DEG10320232; DEG10060216; DEG10330201; DEG10070056; DEG10030423; DEG10370075; DEG10170071; DEG10140028; DEG10070038; DEG10020065; DEG10410133; DEG10360152; DEG10150279; DEG10100198; DEG101203…
Tp_Nichols632	62	DEG10230049; DEG10210115; DEG10390019; DEG10240026; DEG10330294; DEG10280268; DEG10060239; DEG10070070; DEG10400440; DEG10350024; DEG10110193; DEG10200459; DEG10280321; DEG10020124; DEG10350369; DEG10370131; DEG10080130; DEG10020123; DEG10160183; DEG10340351; DEG10380066; DEG10230083; DEG10170147; DEG10240125; DEG10210140; DEG10180523; DEG10180407; DEG10320298; DEG10190240; DEG10120191; DEG101402…
Tp_Nichols638	1	DEG10110050;
Tp_Nichols640	1	DEG10170216;
Tp_Nichols642	9	DEG10280042; DEG10240032; DEG10060067; DEG10380067; DEG10020068; DEG10140279; DEG10370068; DEG10350027; DEG10170072;
Tp_Nichols652	24	DEG10100608; DEG10170191; DEG10380106; DEG10010155; DEG10070190; DEG10210108; DEG10220173; DEG10190177; DEG10350016; DEG10240013; DEG10270680; DEG10130266; DEG10050575; DEG10250763; DEG10340369; DEG10230097; DEG10400204; DEG10180455; DEG10160212; DEG10370102; DEG10410210; DEG10320244; DEG10110168; DEG10330215;
Tp_Nichols656	11	DEG10350254; DEG10290157; DEG10300060; DEG10190035; DEG10160040; DEG10100455; DEG10030443; DEG10410329; DEG10250556; DEG10340371; DEG10330041;
Tp_Nichols657	25	DEG10330038; DEG10120317; DEG10270516; DEG10010133; DEG10320037; DEG10050291; DEG10290156; DEG10350255; DEG10150099; DEG10340372; DEG10190032; DEG10250557; DEG10200257; DEG10280065; DEG10130200; DEG10390142; DEG10310179; DEG10030444; DEG10400387; DEG10220234; DEG10160037; DEG10240240; DEG10360143; DEG10410330; DEG10180043;
Tp_Nichols658	31	DEG10290155; DEG10340119; DEG10270517; DEG10390001; DEG10130199; DEG10120046; DEG10010132; DEG10110019; DEG10320039; DEG10100456; DEG10150098; DEG10190034; DEG10380221; DEG10200258; DEG10250558; DEG10020133; DEG10240239; DEG10330040; DEG10170160; DEG10370211; DEG10030445; DEG10350256; DEG10210194; DEG10220006; DEG10230276; DEG10280064; DEG10160039; DEG10140177; DEG10310180; DEG10360144; DEG101800…
Tp_Nichols669	100	DEG10030734; DEG10100215; DEG10340077; DEG10330114; DEG10210103; DEG10050394; DEG10020083; DEG10350028; DEG10220139; DEG10270222; DEG10400139; DEG10350153; DEG10360293; DEG10130324; DEG10300045; DEG10120209; DEG10350194; DEG10280318; DEG10280312; DEG10050262; DEG10260086; DEG10180475; DEG10050060; DEG10320118; DEG10020078; DEG10170084; DEG10030320; DEG10340052; DEG10060049; DEG10270247; DEG103700…
Tp_Nichols672	45	DEG10340054; DEG10360165; DEG10030158; DEG10060277; DEG10350470; DEG10250595; DEG10050462; DEG10220155; DEG10020180; DEG10410264; DEG10350293; DEG10200232; DEG10270654; DEG10020079; DEG10240212; DEG10250285; DEG10100244; DEG10100490; DEG10320201; DEG10010234; DEG10100590; DEG10170226; DEG10400433; DEG10130211; DEG10290203; DEG10380133; DEG10270547; DEG10120177; DEG10280316; DEG10370124; DEG102101…
Tp_Nichols673	5	DEG10170087; DEG10100245; DEG10010233; DEG10400446; DEG10250286;
Tp_Nichols681	1	DEG10220021;
Tp_Nichols682	3	DEG10410550; DEG10030188; DEG10270161;
Tp_Nichols685	1	DEG10060185;
Tp_Nichols181	13	DEG10170233; DEG10410192; DEG10160083; DEG10350353; DEG10250510; DEG10070009; DEG10330085; DEG10210007; DEG10340021; DEG10080186; DEG10110113; DEG10300027; DEG10220302;
Tp_Nichols694	35	DEG10380081; DEG10230046; DEG10030205; DEG10100488; DEG10290269; DEG10250593; DEG10400065; DEG10050398; DEG10060214; DEG10410432; DEG10110138; DEG10140149; DEG10160066; DEG10220280; DEG10190139; DEG10240233; DEG10280518; DEG10200184; DEG10360057; DEG10330067; DEG10010081; DEG10390166; DEG10120301; DEG10340285; DEG10320193; DEG10020218; DEG10150213; DEG10180367; DEG10350260; DEG10140148; DEG101301…
Tp_Nichols705	23	DEG10010135; DEG10060022; DEG10200003; DEG10130165; DEG10220382; DEG10360078; DEG10370209; DEG10140265; DEG10180057; DEG10170162; DEG10160176; DEG10120228; DEG10230071; DEG10350091; DEG10210192; DEG10380219; DEG10320049; DEG10020135; DEG10150187; DEG10050066; DEG10330179; DEG10290240; DEG10240305;
Tp_Nichols706	3	DEG10280390; DEG10200022; DEG10410536;
Tp_Nichols709	1	DEG10350155;
Tp_Nichols714	5	DEG10350141; DEG10140158; DEG10060031; DEG10060030; DEG10180247;
Tp_Nichols715	17	DEG10270436; DEG10410115; DEG10050061; DEG10400633; DEG10140157; DEG10100383; DEG10060031; DEG10030729; DEG10250469; DEG10270435; DEG10180247; DEG10100382; DEG10350141; DEG10180248; DEG10350142; DEG10180188; DEG10250468;
Tp_Nichols716	2	DEG10180187; DEG10050163;
Tp_Nichols722	24	DEG10130236; DEG10210186; DEG10170299; DEG10150018; DEG10250065; DEG10230088; DEG10160202; DEG10320236; DEG10370206; DEG10070138; DEG10310075; DEG10330205; DEG10240050; DEG10060015; DEG10010257; DEG10020239; DEG10030089; DEG10400366; DEG10290094; DEG10360022; DEG10180436; DEG10380216; DEG10140030; DEG10190169;
Tp_Nichols726	2	DEG10400250; DEG10060314;
Tp_Nichols729	41	DEG10020135; DEG10120128; DEG10230121; DEG10210088; DEG10400545; DEG10130253; DEG10060218; DEG10030435; DEG10330047; DEG10020201; DEG10140286; DEG10050250; DEG10400154; DEG10160046; DEG10360137; DEG10180051; DEG10380155; DEG10140265; DEG10240076; DEG10290164; DEG10410335; DEG10380219; DEG10010214; DEG10010135; DEG10340106; DEG10280230; DEG10210192; DEG10150104; DEG10220005; DEG10320045; DEG101900…
Tp_Nichols184	100	DEG10030734; DEG10100216; DEG10270457; DEG10340077; DEG10330114; DEG10180114; DEG10050394; DEG10350028; DEG10050540; DEG10270222; DEG10250225; DEG10250335; DEG10360055; DEG10120209; DEG10130277; DEG10350194; DEG10150123; DEG10180246; DEG10280312; DEG10180475; DEG10100446; DEG10360106; DEG10050060; DEG10400349; DEG10320118; DEG10410486; DEG10060049; DEG10350332; DEG10250613; DEG10080223; DEG103402…
Tp_Nichols742	15	DEG10070209; DEG10030067; DEG10380208; DEG10010072; DEG10080161; DEG10270600; DEG10330338; DEG10230282; DEG10100540; DEG10400546; DEG10290334; DEG10250669; DEG10050568; DEG10210054; DEG10220247;
Tp_Nichols751	75	DEG10130096; DEG10400041; DEG10380059; DEG10030494; DEG10130311; DEG10150286; DEG10200195; DEG10170194; DEG10390005; DEG10100373; DEG10120258; DEG10010182; DEG10150241; DEG10400402; DEG10350216; DEG10280349; DEG10310082; DEG10220018; DEG10050356; DEG10350005; DEG10230249; DEG10060268; DEG10360036; DEG10240278; DEG10160061; DEG10380040; DEG10220019; DEG10070211; DEG10180396; DEG10140009; DEG103601…
Tp_Nichols753	4	DEG10140033; DEG10010168; DEG10410311; DEG10350064;
Tp_Nichols186	2	DEG10340109; DEG10230120;
Tp_Nichols754	6	DEG10160189; DEG10400097; DEG10330191; DEG10280079; DEG10020142; DEG10080023;
Tp_Nichols187	2	DEG10180134; DEG10250527;
Tp_Nichols767	1	DEG10200177;
Tp_Nichols768	14	DEG10170188; DEG10340270; DEG10220170; DEG10080098; DEG10410256; DEG10370167; DEG10410234; DEG10230032; DEG10050632; DEG10310062; DEG10050303; DEG10250014; DEG10390098; DEG10380182;
Tp_Nichols777	57	DEG10230049; DEG10350369; DEG10170147; DEG10380142; DEG10330294; DEG10210115; DEG10280268; DEG10060239; DEG10230083; DEG10400440; DEG10350024; DEG10110193; DEG10320217; DEG10280321; DEG10020124; DEG10370131; DEG10080130; DEG10020123; DEG10160183; DEG10380066; DEG10070070; DEG10240125; DEG10210140; DEG10180523; DEG10180407; DEG10330185; DEG10190240; DEG10120191; DEG10030109; DEG10130268; DEG103900…
Tp_Nichols778	1	DEG10350484;
Tp_Nichols780	1	DEG10320139;
Tp_Nichols784	3	DEG10290275; DEG10030408; DEG10180329;
Tp_Nichols190	6	DEG10310012; DEG10120127; DEG10320030; DEG10180035; DEG10370055; DEG10290125;
Tp_Nichols788	2	DEG10030188; DEG10270161;
Tp_Nichols789	1	DEG10180321;
Tp_Nichols794	3	DEG10380239; DEG10250369; DEG10270341;
Tp_Nichols808	21	DEG10190187; DEG10220350; DEG10160230; DEG10280432; DEG10320252; DEG10130364; DEG10170238; DEG10100393; DEG10240120; DEG10060197; DEG10400303; DEG10340142; DEG10390209; DEG10200050; DEG10330233; DEG10120165; DEG10010196; DEG10020185; DEG10030076; DEG10290320; DEG10140127;
Tp_Nichols809	4	DEG10140244; DEG10020092; DEG10060348; DEG10200181;
Tp_Nichols194	1	DEG10310176;
Tp_Nichols817	4	DEG10020060; DEG10180477; DEG10020295; DEG10050416;
Tp_Nichols818	42	DEG10240003; DEG10330331; DEG10060300; DEG10350179; DEG10010113; DEG10340404; DEG10400531; DEG10270171; DEG10050569; DEG10320263; DEG10310005; DEG10370165; DEG10230268; DEG10380180; DEG10070214; DEG10160327; DEG10250267; DEG10290009; DEG10190203; DEG10030007; DEG10070114; DEG10410137; DEG10210163; DEG10290147; DEG10390262; DEG10180489; DEG10100227; DEG10150004; DEG10020090; DEG10140017; DEG102301…
Tp_Nichols837	1	DEG10050207;
Tp_Nichols839	1	DEG10070241;
Tp_Nichols840	1	DEG10050153;
Tp_Nichols841	1	DEG10050590;
Tp_Nichols842	15	DEG10240075; DEG10270444; DEG10340344; DEG10130350; DEG10390169; DEG10220285; DEG10400025; DEG10230005; DEG10250474; DEG10200449; DEG10280263; DEG10410240; DEG10310106; DEG10350068; DEG10100389;
Tp_Nichols849	100	DEG10030734; DEG10320118; DEG10330114; DEG10330295; DEG10100381; DEG10050394; DEG10350028; DEG10220139; DEG10250225; DEG10400139; DEG10130324; DEG10120209; DEG10150123; DEG10180246; DEG10300009; DEG10260086; DEG10180475; DEG10100446; DEG10050060; DEG10400349; DEG10190094; DEG10020078; DEG10170084; DEG10350332; DEG10250613; DEG10370038; DEG10370226; DEG10370225; DEG10210103; DEG10200045; DEG101401…
Tp_Nichols853	3	DEG10270081; DEG10250086; DEG10100060;
Tp_Nichols859	3	DEG10220354; DEG10350126; DEG10050077;
Tp_Nichols863	2	DEG10410383; DEG10280071;
Tp_Nichols867	2	DEG10110224; DEG10240131;
Tp_Nichols868	3	DEG10370073; DEG10170181; DEG10380072;
Tp_Nichols872	3	DEG10050100; DEG10400449; DEG10030542;
Tp_Nichols874	1	DEG10270431;
Tp_Nichols201	4	DEG10240051; DEG10290010; DEG10200410; DEG10350047;
Tp_Nichols886	2	DEG10020025; DEG10020076;
Tp_Nichols887	1	DEG10350118;
Tp_Nichols890	33	DEG10160166; DEG10170174; DEG10130437; DEG10240365; DEG10220460; DEG10100424; DEG10020094; DEG10400115; DEG10010170; DEG10320057; DEG10410175; DEG10330169; DEG10010146; DEG10110031; DEG10190052; DEG10020164; DEG10020147; DEG10050524; DEG10290144; DEG10120207; DEG10030185; DEG10270463; DEG10340128; DEG10390280; DEG10280198; DEG10150062; DEG10250489; DEG10360181; DEG10230281; DEG10180080; DEG102704…
Tp_Nichols892	10	DEG10370120; DEG10140152; DEG10390053; DEG10170304; DEG10220098; DEG10380127; DEG10340080; DEG10070191; DEG10060086; DEG10230227;
Tp_Nichols894	12	DEG10200194; DEG10030493; DEG10320204; DEG10160054; DEG10070210; DEG10180394; DEG10010071; DEG10280427; DEG10190148; DEG10330055; DEG10170290; DEG10210053;
Tp_Nichols203	10	DEG10060046; DEG10220298; DEG10340345; DEG10410283; DEG10300083; DEG10170083; DEG10140135; DEG10400451; DEG10050343; DEG10020075;
Tp_Nichols204	2	DEG10120310; DEG10170097;
Tp_Nichols911	19	DEG10060168; DEG10390221; DEG10310159; DEG10100040; DEG10170213; DEG10100375; DEG10020172; DEG10240158; DEG10380202; DEG10250458; DEG10210187; DEG10250062; DEG10400670; DEG10060011; DEG10140291; DEG10370192; DEG10400448; DEG10220371; DEG10290097;
Tp_Nichols918	30	DEG10030595; DEG10100277; DEG10060164; DEG10010207; DEG10220197; DEG10400013; DEG10380102; DEG10360093; DEG10080017; DEG10170246; DEG10200124; DEG10340212; DEG10130386; DEG10070155; DEG10280284; DEG10390115; DEG10160094; DEG10290211; DEG10230016; DEG10140092; DEG10050473; DEG10120269; DEG10020191; DEG10190120; DEG10410014; DEG10210135; DEG10330096; DEG10180288; DEG10250342; DEG10320128;
Tp_Nichols919	2	DEG10390230; DEG10220393;
Tp_Nichols920	21	DEG10230179; DEG10340546; DEG10120279; DEG10100270; DEG10160196; DEG10180429; DEG10320230; DEG10050325; DEG10220176; DEG10130089; DEG10270309; DEG10250332; DEG10410509; DEG10360013; DEG10030142; DEG10330199; DEG10290126; DEG10280140; DEG10240069; DEG10190168; DEG10200081;
Tp_Nichols922	1	DEG10400645;
Tp_Nichols930	3	DEG10030719; DEG10260104; DEG10280426;
Tp_Nichols934	4	DEG10100461; DEG10250563; DEG10050403; DEG10270521;
Tp_Nichols944	22	DEG10130279; DEG10030055; DEG10120082; DEG10200432; DEG10190289; DEG10010073; DEG10310084; DEG10160341; DEG10080116; DEG10220220; DEG10320345; DEG10340108; DEG10180588; DEG10330346; DEG10100539; DEG10110222; DEG10170289; DEG10350050; DEG10410030; DEG10140037; DEG10390130; DEG10290075;
Tp_Nichols945	16	DEG10240228; DEG10380213; DEG10320168; DEG10160084; DEG10150091; DEG10030387; DEG10330086; DEG10360150; DEG10010074; DEG10110106; DEG10410113; DEG10200015; DEG10180306; DEG10290242; DEG10070117; DEG10190124;
Tp_Nichols952	3	DEG10220128; DEG10400138; DEG10390076;
Tp_Nichols957	25	DEG10290307; DEG10240063; DEG10220205; DEG10360250; DEG10160002; DEG10120109; DEG10370137; DEG10400132; DEG10130007; DEG10210100; DEG10280410; DEG10030146; DEG10390121; DEG10330002; DEG10170167; DEG10230136; DEG10270501; DEG10380150; DEG10100439; DEG10190001; DEG10340505; DEG10200098; DEG10180005; DEG10250541; DEG10320004;
Tp_Nichols959	6	DEG10020138; DEG10130060; DEG10160221; DEG10330224; DEG10120364; DEG10030136;
Tp_Nichols961	29	DEG10190183; DEG10130058; DEG10010136; DEG10350217; DEG10080305; DEG10370178; DEG10330226; DEG10160223; DEG10110171; DEG10410111; DEG10070137; DEG10250550; DEG10170163; DEG10340048; DEG10270507; DEG10220059; DEG10240294; DEG10060112; DEG10100450; DEG10120366; DEG10360267; DEG10200010; DEG10230194; DEG10020136; DEG10380191; DEG10140070; DEG10290113; DEG10310049; DEG10030134;
Tp_Nichols969	3	DEG10050580; DEG10140109; DEG10140292;
Tp_Nichols971	28	DEG10240108; DEG10290366; DEG10330016; DEG10400420; DEG10200347; DEG10050407; DEG10190012; DEG10220119; DEG10230209; DEG10130040; DEG10180017; DEG10320016; DEG10170128; DEG10210060; DEG10350382; DEG10120139; DEG10380174; DEG10340062; DEG10010104; DEG10150255; DEG10160015; DEG10360225; DEG10110007; DEG10360228; DEG10070140; DEG10370160; DEG10390068; DEG10020108;
Tp_Nichols976	26	DEG10100464; DEG10060361; DEG10130447; DEG10380105; DEG10320214; DEG10330182; DEG10160180; DEG10020126; DEG10240191; DEG10210126; DEG10190156; DEG10180404; DEG10110150; DEG10010125; DEG10120328; DEG10270523; DEG10410064; DEG10400577; DEG10350309; DEG10370101; DEG10030112; DEG10140173; DEG10070040; DEG10290136; DEG10170150; DEG10250565;
Tp_Nichols981	1	DEG10340104;
Tp_Nichols986	6	DEG10390012; DEG10140153; DEG10400314; DEG10100183; DEG10200313; DEG10220030;
Tp_Nichols990	32	DEG10140010; DEG10100061; DEG10120319; DEG10050440; DEG10100453; DEG10270511; DEG10250657; DEG10260099; DEG10160027; DEG10270085; DEG10110014; DEG10410047; DEG10180527; DEG10020166; DEG10350496; DEG10330028; DEG10290067; DEG10250088; DEG10240290; DEG10200427; DEG10140297; DEG10020096; DEG10060228; DEG10180029; DEG10270145; DEG10410239; DEG10400301; DEG10300048; DEG10200055; DEG10320027; DEG101201…
Tp_Nichols991	3	DEG10230242; DEG10340451; DEG10220045;
Tp_Nichols997	11	DEG10350299; DEG10160052; DEG10030495; DEG10320207; DEG10230190; DEG10190151; DEG10240203; DEG10290129; DEG10330053; DEG10120310; DEG10180398;
Tp_Nichols1003	34	DEG10240108; DEG10290369; DEG10240105; DEG10130458; DEG10220249; DEG10400378; DEG10190009; DEG10230225; DEG10220117; DEG10280459; DEG10070075; DEG10200350; DEG10180016; DEG10320013; DEG10170105; DEG10250412; DEG10210060; DEG10030482; DEG10120133; DEG10340064; DEG10150255; DEG10410444; DEG10010102; DEG10210154; DEG10160012; DEG10370049; DEG10230211; DEG10110006; DEG10360228; DEG10330013; DEG103800…
Tp_Nichols1005	2	DEG10270192; DEG10250198;
Tp_Nichols1007	6	DEG10340195; DEG10390037; DEG10110045; DEG10180408; DEG10220068; DEG10110108;
Tp_Nichols1011	2	DEG10270450; DEG10250480;
Tp_Nichols214	33	DEG10360198; DEG10030531; DEG10150038; DEG10060128; DEG10400569; DEG10050271; DEG10080260; DEG10160306; DEG10370014; DEG10190223; DEG10390247; DEG10200141; DEG10280177; DEG10130426; DEG10240331; DEG10120059; DEG10010041; DEG10170328; DEG10230150; DEG10380012; DEG10250139; DEG10340475; DEG10350401; DEG10270127; DEG10410403; DEG10020272; DEG10220414; DEG10140235; DEG10210016; DEG10330310; DEG103202…
Tp_Nichols1018	1	DEG10020299;
Tp_Nichols1020	1	DEG10070107;
Tp_Nichols1021	27	DEG10240349; DEG10310124; DEG10360335; DEG10120008; DEG10230024; DEG10050355; DEG10170293; DEG10350004; DEG10250770; DEG10220286; DEG10200106; DEG10380042; DEG10030001; DEG10270687; DEG10100613; DEG10400414; DEG10340307; DEG10160272; DEG10070108; DEG10110202; DEG10330276; DEG10080290; DEG10370047; DEG10190258; DEG10290001; DEG10410142; DEG10320311;
Tp_Nichols215	31	DEG10110186; DEG10290039; DEG10360197; DEG10120060; DEG10150039; DEG10030530; DEG10050272; DEG10400568; DEG10370015; DEG10160307; DEG10250140; DEG10200142; DEG10060129; DEG10190222; DEG10390246; DEG10100110; DEG10170327; DEG10240330; DEG10130425; DEG10010042; DEG10020271; DEG10380013; DEG10220413; DEG10340474; DEG10410402; DEG10270128; DEG10140234; DEG10210017; DEG10280176; DEG10320282; DEG103303…
Tp_Nichols1027	1	DEG10350155;
Tp_Nichols1031	1	DEG10050371;
Tp_Nichols1050	4	DEG10020030; DEG10300079; DEG10050604; DEG10190180;
Tp_Nichols1053	3	DEG10100254; DEG10120107; DEG10250307;
Tp_Nichols1057	6	DEG10410169; DEG10350500; DEG10130392; DEG10170068; DEG10270248; DEG10350034;
Tp_Nichols1058	2	DEG10390109; DEG10220188;
Tp_Nichols1062	1	DEG10080230;
Tp_Nichols1070	3	DEG10080322; DEG10150265; DEG10050013;
Tp_Nichols1075	5	DEG10340360; DEG10050610; DEG10220143; DEG10390083; DEG10200118;
Tp_Nichols220	30	DEG10240326; DEG10410397; DEG10150044; DEG10120065; DEG10400563; DEG10360196; DEG10050277; DEG10230149; DEG10020266; DEG10210020; DEG10340469; DEG10290044; DEG10200147; DEG10390243; DEG10320277; DEG10100115; DEG10140229; DEG10130420; DEG10170322; DEG10010047; DEG10060134; DEG10110185; DEG10030525; DEG10350400; DEG10080256; DEG10160312; DEG10190217; DEG10280171; DEG10220409; DEG10330316;
Tp_Nichols1076	2	DEG10110061; DEG10050085;
Tp_Nichols1077	26	DEG10320089; DEG10250414; DEG10270494; DEG10250047; DEG10130148; DEG10190073; DEG10370056; DEG10250533; DEG10230298; DEG10200461; DEG10330140; DEG10220084; DEG10030370; DEG10270381; DEG10100436; DEG10340146; DEG10360086; DEG10270051; DEG10270333; DEG10380053; DEG10270604; DEG10280400; DEG10250365; DEG10410070; DEG10100024; DEG10100331;
Tp_Nichols1083	2	DEG10220282; DEG10400340;
Tp_Nichols221	28	DEG10240325; DEG10130418; DEG10410395; DEG10180497; DEG10120067; DEG10360195; DEG10400562; DEG10050279; DEG10020264; DEG10290046; DEG10340467; DEG10220407; DEG10210021; DEG10270130; DEG10140227; DEG10280169; DEG10320275; DEG10100116; DEG10200149; DEG10010049; DEG10170320; DEG10060136; DEG10250142; DEG10310217; DEG10030523; DEG10160314; DEG10190215; DEG10330318;
Tp_Nichols1090	31	DEG10240028; DEG10130358; DEG10120234; DEG10150283; DEG10060065; DEG10400054; DEG10050135; DEG10220046; DEG10010014; DEG10280188; DEG10380002; DEG10080301; DEG10140309; DEG10210003; DEG10290108; DEG10170029; DEG10310030; DEG10100153; DEG10250188; DEG10340166; DEG10410508; DEG10270186; DEG10230315; DEG10360261; DEG10180202; DEG10320166; DEG10390022; DEG10190100; DEG10020035; DEG10070002; DEG102000…
Tp_Nichols1094	16	DEG10310037; DEG10290301; DEG10280285; DEG10150059; DEG10320055; DEG10220178; DEG10340168; DEG10160168; DEG10240168; DEG10360183; DEG10400643; DEG10200169; DEG10330171; DEG10100407; DEG10070027; DEG10180077;
Tp_Nichols222	34	DEG10240324; DEG10170319; DEG10130417; DEG10010050; DEG10360194; DEG10400561; DEG10230148; DEG10020263; DEG10120068; DEG10110184; DEG10340466; DEG10220406; DEG10370016; DEG10210022; DEG10270131; DEG10140226; DEG10320274; DEG10280168; DEG10100117; DEG10410394; DEG10350399; DEG10150046; DEG10290047; DEG10390241; DEG10060137; DEG10050280; DEG10180496; DEG10030522; DEG10380015; DEG10250143; DEG101603…
Tp_Nichols1097	4	DEG10010142; DEG10080128; DEG10220323; DEG10060105;
Tp_Nichols1101	4	DEG10160164; DEG10050571; DEG10410354; DEG10330167;
Tp_Nichols1120	2	DEG10050485; DEG10070194;
Tp_Nichols1123	16	DEG10380047; DEG10250484; DEG10270453; DEG10350099; DEG10410356; DEG10250483; DEG10050238; DEG10100398; DEG10270454; DEG10280090; DEG10400397; DEG10200285; DEG10400659; DEG10310021; DEG10170075; DEG10400658;
Tp_Nichols1	30	DEG10340394; DEG10170001; DEG10270001; DEG10050351; DEG10060380; DEG10020001; DEG10120001; DEG10400277; DEG10200005; DEG10180542; DEG10350003; DEG10280001; DEG10320309; DEG10250001; DEG10210001; DEG10140001; DEG10290004; DEG10030003; DEG10410001; DEG10240351; DEG10150001; DEG10230112; DEG10160275; DEG10010001; DEG10220001; DEG10370001; DEG10330279; DEG10190255; DEG10360001; DEG10100001;
Tp_Nichols2	27	DEG10170002; DEG10270002; DEG10380001; DEG10050350; DEG10120002; DEG10410002; DEG10200029; DEG10350002; DEG10130001; DEG10320308; DEG10250002; DEG10220383; DEG10210002; DEG10140002; DEG10290005; DEG10240352; DEG10390225; DEG10330280; DEG10230072; DEG10080082; DEG10160276; DEG10010002; DEG10340327; DEG10370002; DEG10360002; DEG10280290; DEG10190254;
Tp_Nichols3	4	DEG10340135; DEG10270003; DEG10020002; DEG10110201;
Tp_Nichols5	55	DEG10060003; DEG10390044; DEG10200196; DEG10290228; DEG10320187; DEG10170177; DEG10120126; DEG10230048; DEG10170005; DEG10330078; DEG10200197; DEG10270005; DEG10150117; DEG10180351; DEG10160208; DEG10190132; DEG10180449; DEG10020004; DEG10140142; DEG10370111; DEG10110131; DEG10280495; DEG10280027; DEG10210120; DEG10210122; DEG10250004; DEG10290331; DEG10390108; DEG10130327; DEG10140048; DEG100601…
Tp_Nichols226	25	DEG10390237; DEG10170315; DEG10240320; DEG10010054; DEG10180493; DEG10410390; DEG10060140; DEG10360192; DEG10030518; DEG10230146; DEG10340462; DEG10220402; DEG10320270; DEG10350397; DEG10140223; DEG10280164; DEG10330323; DEG10150049; DEG10120072; DEG10050284; DEG10110181; DEG10160319; DEG10020259; DEG10200153; DEG10190210;
Tp_Nichols14	2	DEG10050478; DEG10410354;
Tp_Nichols16	9	DEG10170220; DEG10250200; DEG10050182; DEG10070073; DEG10140210; DEG10310029; DEG10020176; DEG10080151; DEG10060232;
Tp_Nichols227	33	DEG10290052; DEG10170314; DEG10390236; DEG10130412; DEG10180492; DEG10010055; DEG10060141; DEG10360191; DEG10230145; DEG10030517; DEG10220401; DEG10340461; DEG10250145; DEG10160320; DEG10210025; DEG10270133; DEG10350396; DEG10140222; DEG10240319; DEG10190209; DEG10280163; DEG10330324; DEG10400558; DEG10410389; DEG10120073; DEG10380016; DEG10110180; DEG10080252; DEG10020258; DEG10370019; DEG102001…
Tp_Nichols31	26	DEG10400194; DEG10230099; DEG10400055; DEG10290344; DEG10190189; DEG10410533; DEG10320254; DEG10170295; DEG10270240; DEG10360236; DEG10340375; DEG10250246; DEG10070059; DEG10390144; DEG10100209; DEG10020231; DEG10010252; DEG10030507; DEG10120111; DEG10220236; DEG10160232; DEG10130110; DEG10080106; DEG10330235; DEG10200328; DEG10280119;
Tp_Nichols34	2	DEG10150316; DEG10300090;
Tp_Nichols37	100	DEG10340077; DEG10330114; DEG10330295; DEG10050394; DEG10020083; DEG10350028; DEG10050540; DEG10050542; DEG10220139; DEG10080054; DEG10360055; DEG10140159; DEG10120209; DEG10350194; DEG10150123; DEG10180246; DEG10280312; DEG10180475; DEG10360106; DEG10320118; DEG10290200; DEG10060049; DEG10110217; DEG10250613; DEG10080223; DEG10370038; DEG10370226; DEG10370225; DEG10340219; DEG10140106; DEG103202…
Tp_Nichols38	2	DEG10340109; DEG10230120;
Tp_Nichols42	7	DEG10350128; DEG10030096; DEG10030094; DEG10350187; DEG10180242; DEG10300013; DEG10350499;
Tp_Nichols46	1	DEG10050301;
Tp_Nichols49	2	DEG10390189; DEG10220324;
Tp_Nichols229	29	DEG10170310; DEG10150051; DEG10290053; DEG10380018; DEG10060146; DEG10130411; DEG10360190; DEG10230144; DEG10030515; DEG10160322; DEG10180491; DEG10240316; DEG10280161; DEG10330326; DEG10410388; DEG10400555; DEG10120075; DEG10340458; DEG10050285; DEG10010060; DEG10270607; DEG10020254; DEG10190208; DEG10370021; DEG10220397; DEG10200156; DEG10140217; DEG10250678; DEG10320268;
Tp_Nichols52	16	DEG10350112; DEG10050255; DEG10230271; DEG10260033; DEG10300077; DEG10340373; DEG10400161; DEG10300117; DEG10340112; DEG10410307; DEG10230098; DEG10290358; DEG10410522; DEG10310161; DEG10200294; DEG10300022;
Tp_Nichols63	33	DEG10170008; DEG10330337; DEG10010264; DEG10050567; DEG10230028; DEG10190283; DEG10400331; DEG10020007; DEG10370223; DEG10350103; DEG10130289; DEG10290335; DEG10120221; DEG10180580; DEG10030066; DEG10390164; DEG10060076; DEG10270016; DEG10340304; DEG10210214; DEG10380232; DEG10140196; DEG10220277; DEG10240260; DEG10160333; DEG10280467; DEG10410373; DEG10200206; DEG10250016; DEG10100006; DEG103203…
Tp_Nichols65	5	DEG10010265; DEG10030065; DEG10140197; DEG10060075; DEG10020006;
Tp_Nichols66	20	DEG10280019; DEG10030064; DEG10170019; DEG10050172; DEG10240259; DEG10340399; DEG10060074; DEG10330350; DEG10130288; DEG10410372; DEG10400284; DEG10080234; DEG10010267; DEG10120222; DEG10020021; DEG10200207; DEG10160345; DEG10210051; DEG10190290; DEG10290336;
Tp_Nichols67	22	DEG10330339; DEG10170018; DEG10020223; DEG10190284; DEG10120020; DEG10010268; DEG10070077; DEG10410304; DEG10020020; DEG10130469; DEG10140246; DEG10240038; DEG10200180; DEG10390036; DEG10210050; DEG10350030; DEG10080235; DEG10280251; DEG10220067; DEG10160334; DEG10320338; DEG10030072;
Tp_Nichols231	33	DEG10390231; DEG10290056; DEG10060148; DEG10100546; DEG10230142; DEG10250676; DEG10030512; DEG10210029; DEG10160325; DEG10350394; DEG10190205; DEG10110177; DEG10240313; DEG10130408; DEG10120307; DEG10410386; DEG10170308; DEG10400553; DEG10330329; DEG10360187; DEG10010062; DEG10380019; DEG10050288; DEG10120078; DEG10340455; DEG10020252; DEG10270605; DEG10140215; DEG10370023; DEG10220394; DEG102801…
Tp_Nichols71	4	DEG10280275; DEG10050260; DEG10180524; DEG10290385;
Tp_Nichols73	1	DEG10030373;
Tp_Nichols74	1	DEG10290284;
